# Supplementary material for: A novel sensitive fluorescent turn-on probe for rapid detection of Al3+ and bioimaging
Source: Royal Society of Chemistry journal article supplement (doi:10.1039/c4ra14177f), 2014-12-11
Supplement: c4ra14177f1.pdf [file c4ra14177f1.pdf]

# **A novel sensitive fluorescent turn-on probe for rapid detection of Al<sup>3+</sup> and bioimaging**

Shuai Xia, Si-Yu Xiao, Qing-Qing Hong, Jing-Rong Zou, Sen Yang, Mu-Xue Zhang and Hua Zuo

## **Content**

- Fig. S1** Absorption spectra of probe **L**
- Fig. S2** Optimizing the solution experiment
- Fig. S3** Linear correlation for the detection of limit
- Fig. S4** Benesi-Hiderand plot
- Fig. S5** Jobs plot
- Fig. S6** The relationship between pH and fluorescence intensity
- Fig. S7** <sup>1</sup>H NMR spectrum of **L** in CDCl<sub>3</sub>
- Fig. S8** <sup>13</sup>C NMR spectrum of **L** in CDCl<sub>3</sub>
- Fig. S9** HRMS of **L**

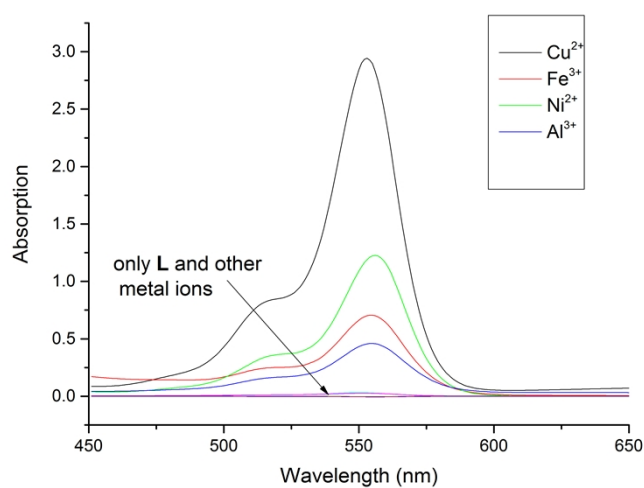

**Fig. S1.** Absorption spectra of probe **L** (25  $\mu\text{M}$ ) in EtOH/HEPES (9:1, v/v, pH 7.2) solution in the presence of 20 equiv. of different metal ions.

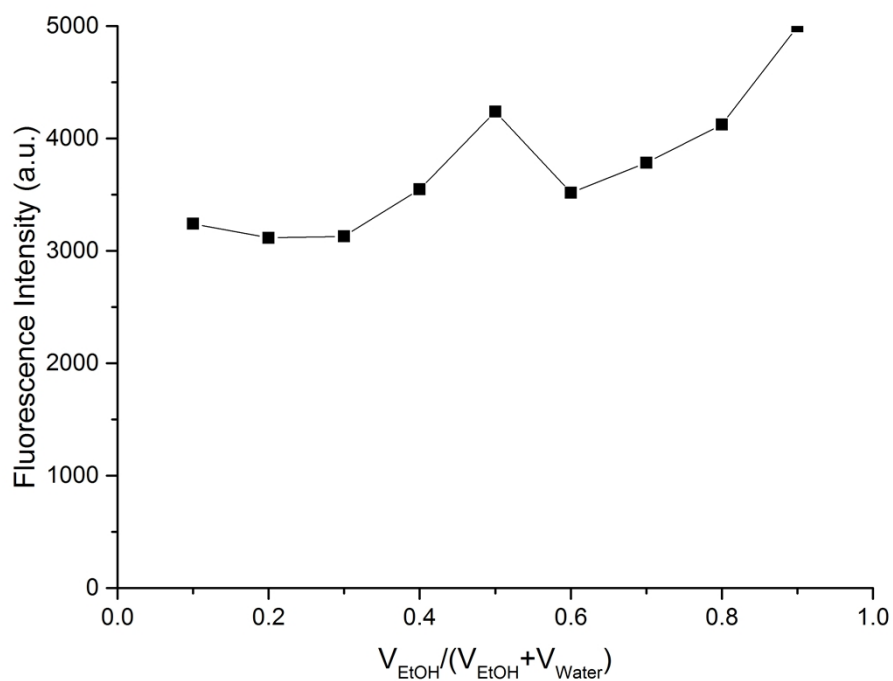

**Fig. S2.** Fluorescence intensity at 578 nm of probe **L** (25  $\mu\text{M}$ ) in different ratios of EtOH/HEPES solution in the presence of 20 equiv. of different  $\text{Al}^{3+}$ .  $\lambda_{\text{ex}} = 560 \text{ nm}$ ,  $\lambda_{\text{em}} = 578 \text{ nm}$ .

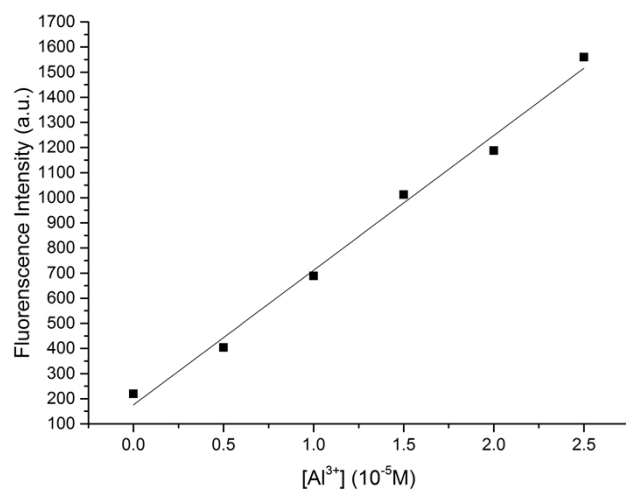

**Fig. S3.** Linear correlation between the fluorescence intensity and Al<sup>3+</sup> concentration ( $R = 0.9902$ ). 25  $\mu\text{M}$  of probe **L** in the presence of various concentrations of AL<sup>3+</sup> ranging from 0–1.0 equiv.  $\lambda_{\text{ex}} = 560 \text{ nm}$ ,  $\lambda_{\text{em}} = 578 \text{ nm}$ .

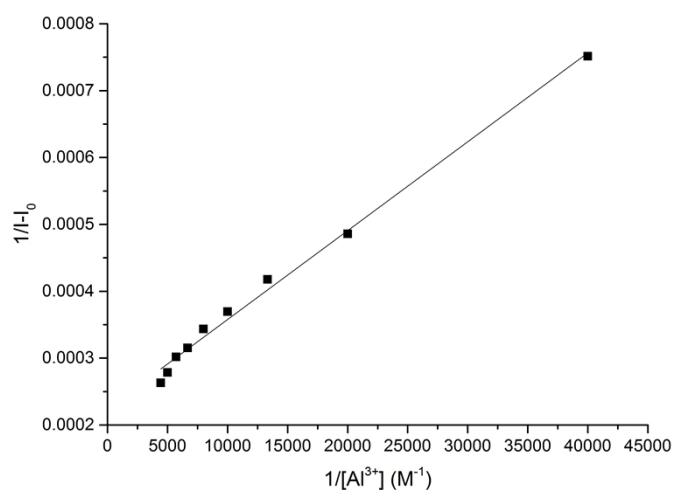

**Fig. S4.** Benesi-Hildebrand plot of 25  $\mu\text{M}$  **L** in buffered EtOH/HEPES (9:1, v/v, pH 7.2) solution in the presence of Al<sup>3+</sup> (1–9 equiv.) ( $R = 0.9926$ ).  $\lambda_{\text{ex}} = 560 \text{ nm}$ ,  $\lambda_{\text{em}} = 578 \text{ nm}$ .

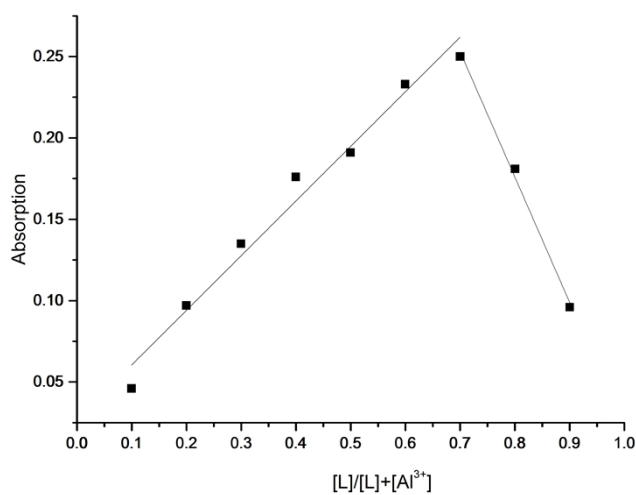

**Fig. S5.** Job's plot evaluated from the absorption spectra of probe **L** and  $Al^{3+}$  in EtOH/HEPES (9:1, v/v, pH 7.2) solution (the total concentration of **L** and  $Al^{3+}$  was  $5.0 \times 10^{-5}M$ ).

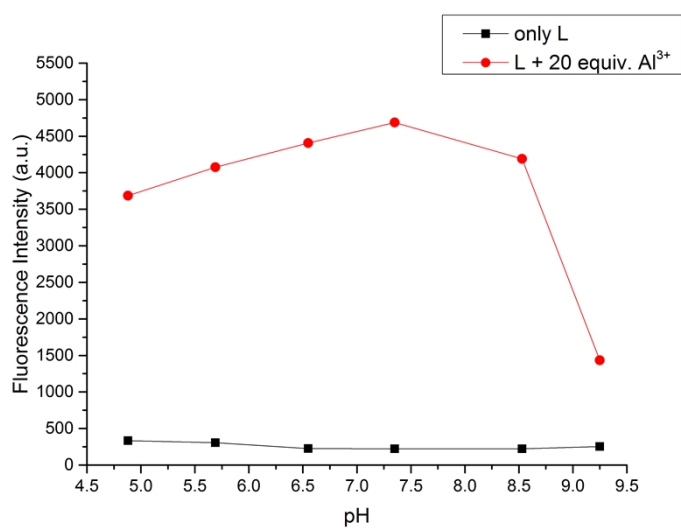

**Fig. S6.** Changes in the emission intensity at 578nm of probe **L** with pH before and after addition of 25 equiv.  $Al^{3+}$  in EtOH/HEPES (9:1, v/v, pH 7.2) solution.  $\lambda_{ex} = 560$  nm,  $\lambda_{em} = 578$  nm.

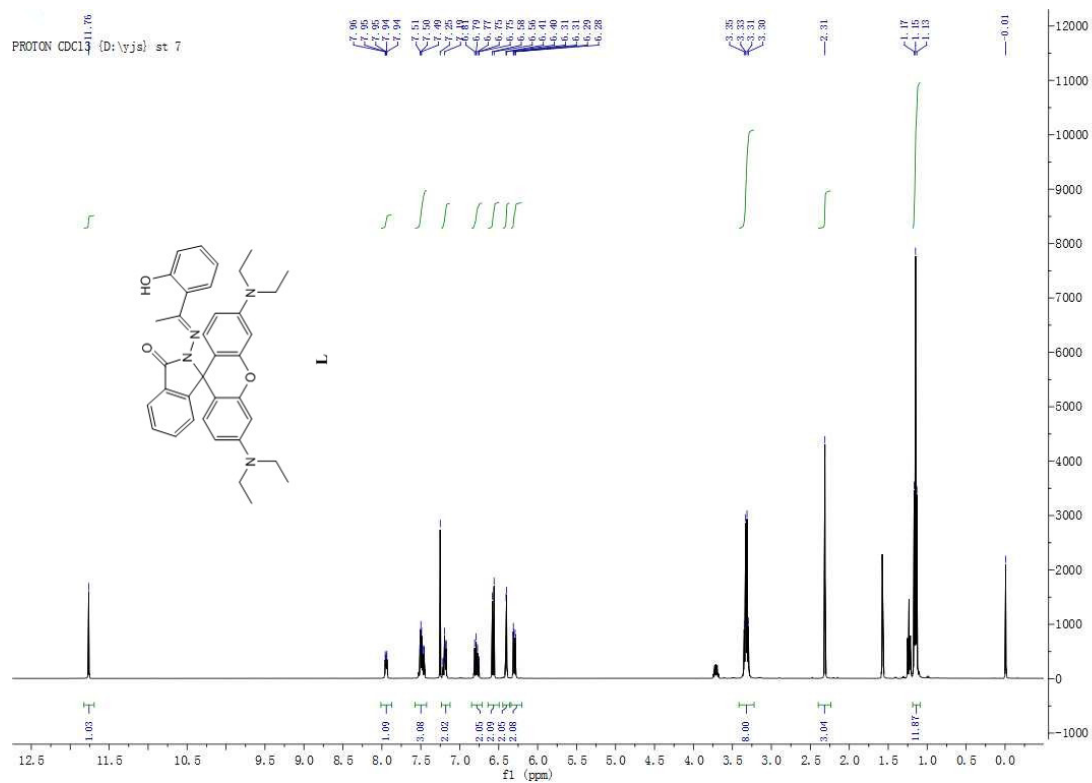

**Fig. S7.** The <sup>1</sup>H NMR spectrum of probe **L**.

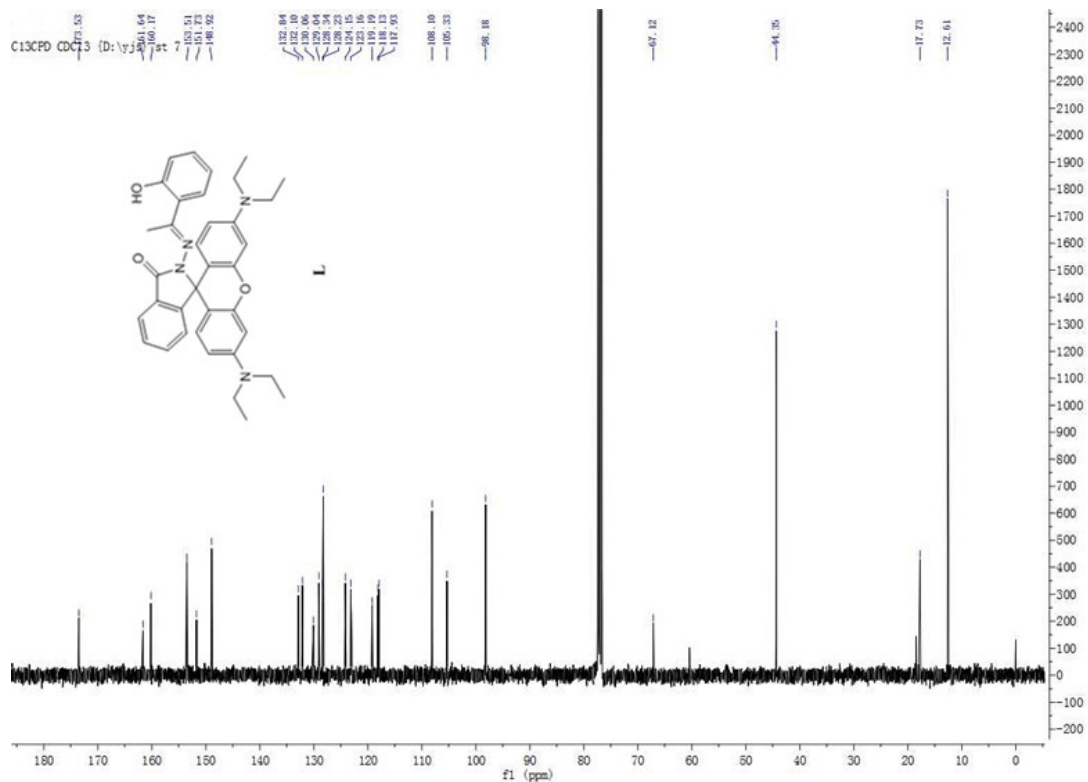

**Fig. S8.** The <sup>13</sup>C NMR spectrum of probe **L**.

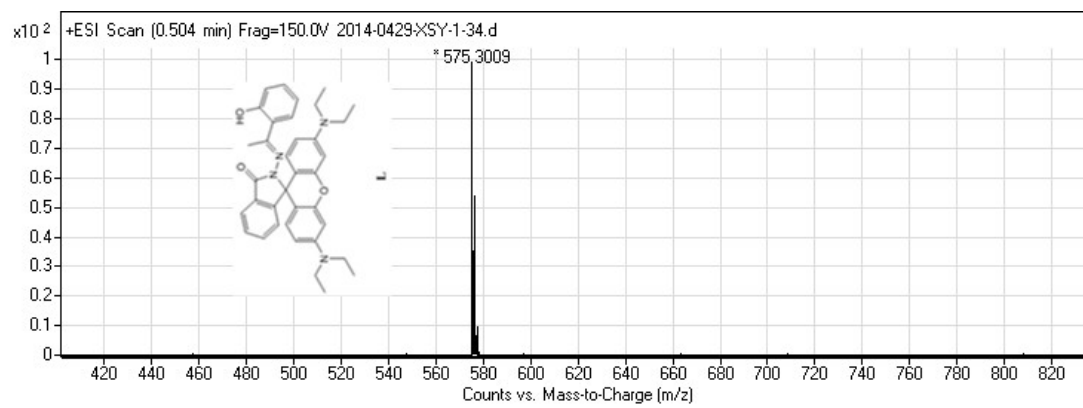

**Fig. S9.** The HRMS of probe L.
